# Supplementary material for: Combinatorial epigenetic patterns as quantitative predictors of chromatin biology
Source: PubMed Central journal article supplement (PMC3922690; doi:10.1186/1471-2164-15-76), 2014-01-28
Supplement: 1471-2164-15-76-S7.pdf [file 1471-2164-15-76-S7.pdf]

**Table S1 - Classification performance of mark-based and code-based logistic regression in the classification of Pol2-bound sites**

|     | mark-based | code-based |
|-----|------------|------------|
| MCC | 0.82       | 0.83       |
| AUC | 0.96       | 0.97       |

AUC – area under the ROC curve; MCC – Matthew’s correlation coefficient
