# Supplementary material for: Combinatorial epigenetic patterns as quantitative predictors of chromatin biology
Source: PubMed Central journal article supplement (PMC3922690; doi:10.1186/1471-2164-15-76), 2014-01-28
Supplement: 1471-2164-15-76-S8.pdf [file 1471-2164-15-76-S8.pdf]

**Table S2 - Parameters of penalized logistic regression models: supervised classification of Pol2-bound TSS-proximal and TSS-distal sites**

| variable | beta (multi) | beta (zero-order) | MCC (zero-order) |
|----------|--------------|-------------------|------------------|
| dnase    | -2.07        | -2.01             | 0.30             |
| H2Az     | -3.33        | -1.40             | 0.17             |
| H3K27ac  | -1.63        | 0.92              | 0.18             |
| H3K27me3 | 11.92        | 4.37              | 0.65             |
| H3K36me3 | 1.20         | 2.58              | 0.33             |
| H3K4me1  | 2.37         | -1.82             | 0.25             |
| H3K4me2  | -17.78       | -2.93             | 0.40             |
| H3K4me3  | 4.29         | -1.66             | 0.27             |
| H3K79me2 | 0.50         | -0.04             | 0.05             |
| H3K9ac   | 16.88        | 2.72              | 0.40             |
| H4K20me1 | -4.71        | -1.08             | 0.13             |
| code 1   | -29.63       | -26.69            | 0.50             |
| code 2   | -15.39       | -16.66            | 0.34             |
| code 3   | 2.03         | -5.96             | 0.16             |
| code 4   | -19.71       | -11.78            | 0.31             |
| code 5   | -3.00        | -13.37            | 0.37             |
| code 6   | 7.76         | -0.09             | 0.14             |
| code 7   | 19.97        | 12.13             | 0.27             |
| code 8   | 26.08        | 43.14             | 0.55             |
| code 9   | 10.30        | 1.84              | 0.05             |
| code 10  | 64.93        | 62.27             | 0.58             |
| code 11  | 14.58        | 0.48              | 0.07             |
| code 12  | 6.70         | 0.07              | 0.08             |

Beta coefficients of multivariate and zero-order penalized logistic regression models. MCC – (Matthew’s correlation coefficient) is a balanced measure of model performance (higher is better).
